# Supplementary material for: HER2 as a novel therapeutic target for cervical cancer
Source: PubMed Central journal article supplement (PMC4742172; doi:10.18632/oncotarget.5283), 2015-09-21
Supplement: oncotarget-06-36219-s001.pdf [file oncotarget-06-36219-s001.pdf]

## SUPPLEMENTARY FIGURES AND TABLES

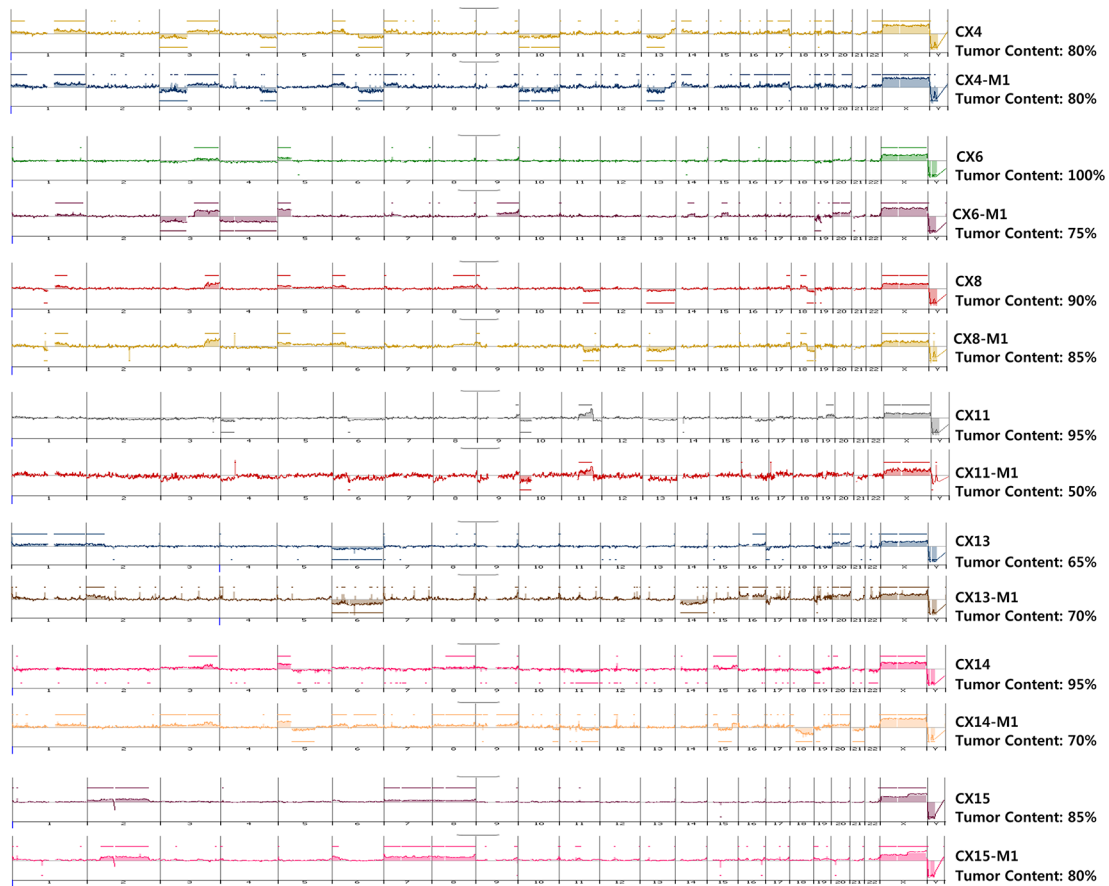

**Supplementary Figure S1: Array comparative genomic hybridization results of 7 patient tumors and PDXs.** Recurrence of copy number alteration is plotted on the y-axis, and each probe is aligned along the x-axis in chromosomal order. Note the similarity of genomic profiles between the original tumors and their PDX counterparts.

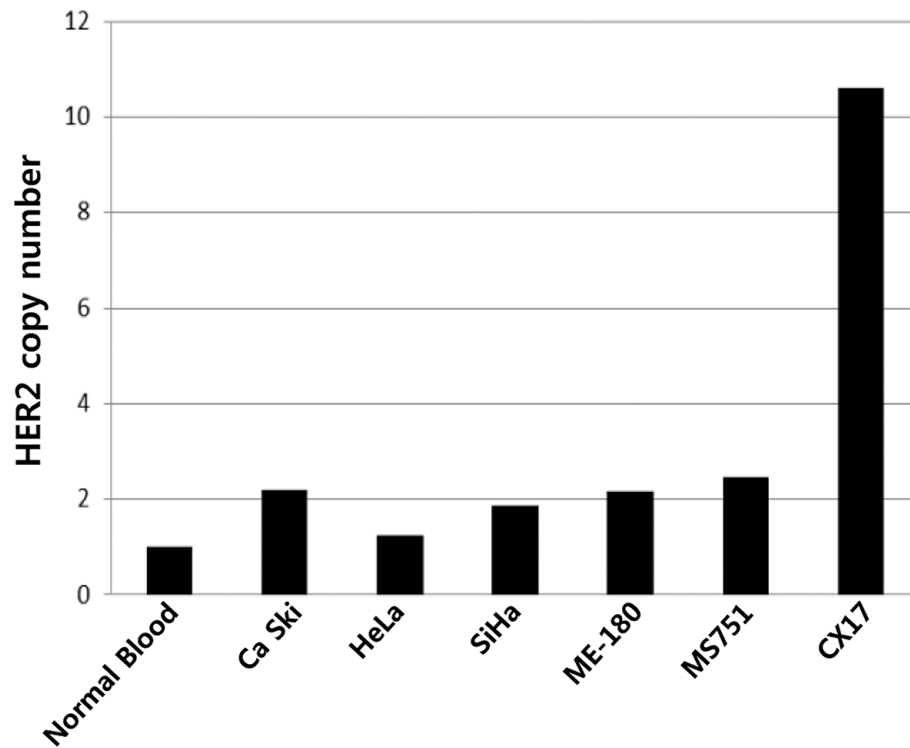

Supplementary Figure S2: Quantitative PCR gene copy number analysis in cervical cancer cell lines (HeLa, SiHa, ME-180, MS751, and Caski).

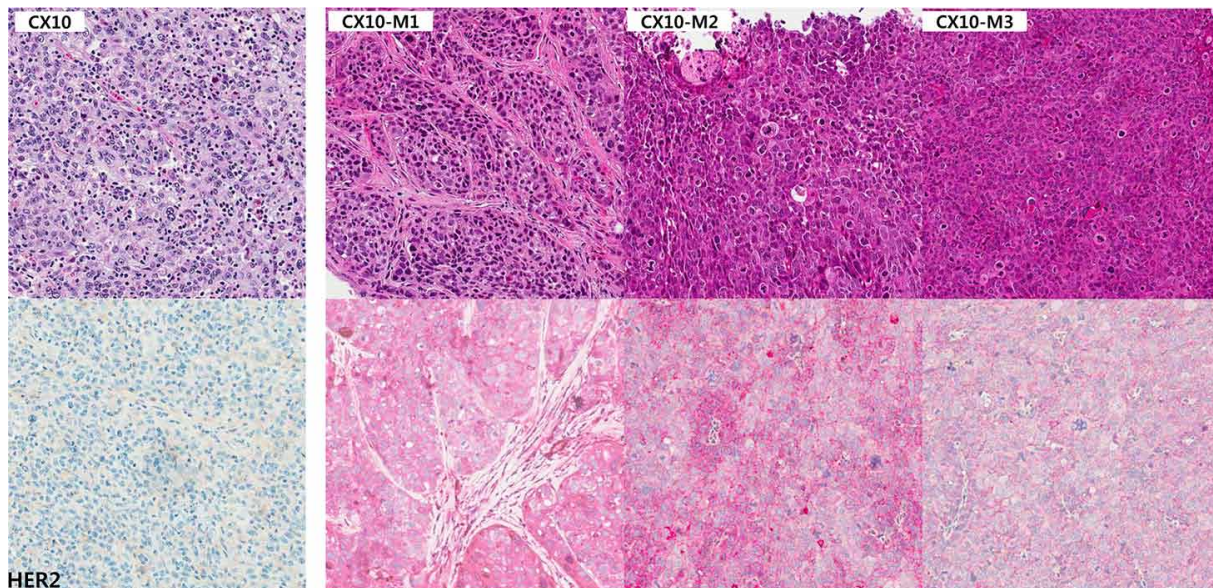

Supplementary Figure S3: Histology and HER2 immunohistochemistry of the *HER2*-non-amplified samples (CX10). HER2 immunohistochemical staining was negative in the patient tumor sample (CX10, lower panel). There was nonspecific weak staining with serial PDX passages (CX10-M1, CX10-M2, and CX10-M3, lower panels). The tumor histology following serial passaging shows little difference between them.



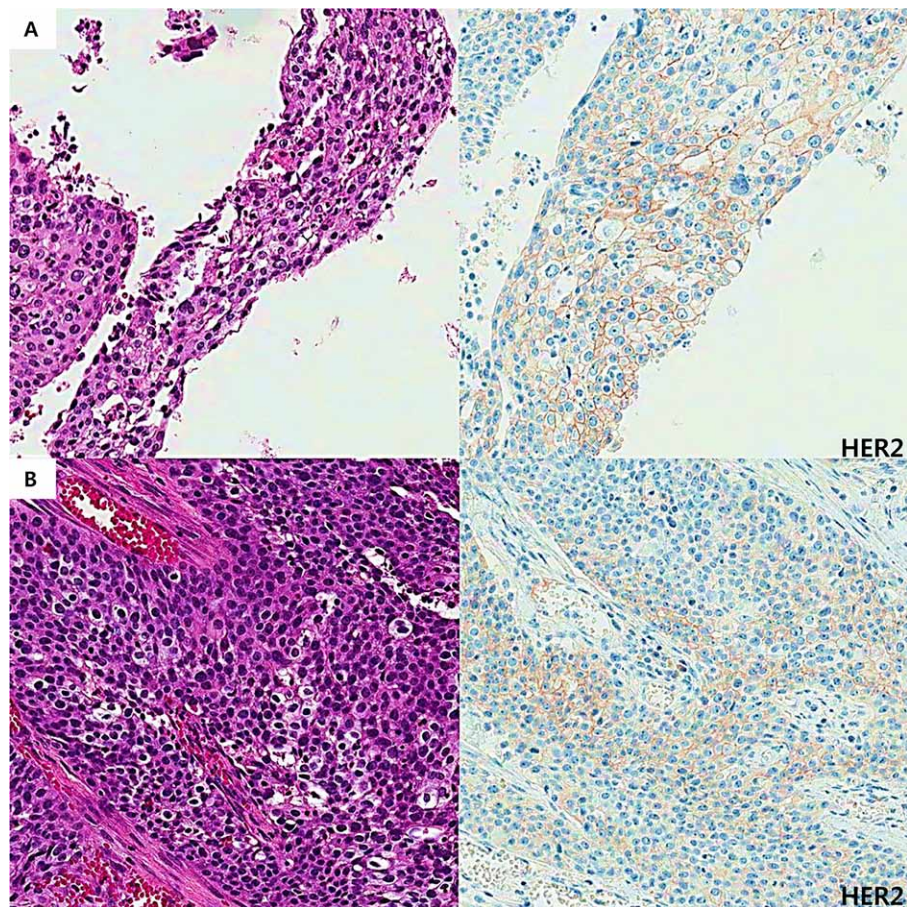

**Supplementary Figure S4: Histology and HER2 immunohistochemistry of the rectal wall and colon metastasis samples of a cervical cancer patient.** A. Immunohistochemical staining shows membranous HER2 positivity in the rectal wall squamous cell carcinoma metastasis from the cervix (HER2,  $\times 200$ ). B. Metastatic tumor cells in the colon show HER2 positivity (HER2,  $\times 200$ ).

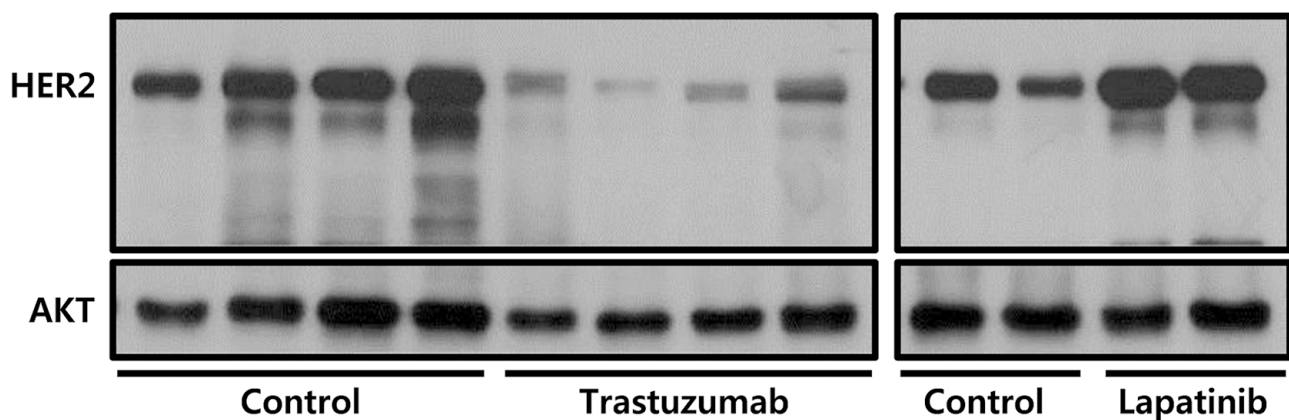

**Supplementary Figure S5: Trastuzumab but not lapatinib induced HER2 degradation.** Female BALB/c nude mice bearing the CX17 tumor tissue (CX17-M5) were treated with the control vehicle or trastuzumab 10 mg/kg twice weekly or lapatinib 100 mg/kg daily as indicated. Western blot analysis results with the indicated antibodies of representative tumors from CX17 PDXs at the end of treatment (8 weeks) are shown.

**Supplementary Table S1: List of primer sequences used to generate qPCR/qRT-PCR expression data**

| <b>HER2 copy number (qPCR)</b> |                           |                            |
|--------------------------------|---------------------------|----------------------------|
| <b>Gene</b>                    | <b>Forward</b>            | <b>Reverse</b>             |
| HER2                           | GGAGGATGTGCGGCTCG         | CATGGTTGGGACTCTTGACCA      |
| ALB (reference)                | TGAAACATACGTTCCCAAAGAGTTT | CTCTCCTTCTCAGAAAGTGTGCATAT |

  

| <b>HER2 expression (qRT-PCR)</b> |                           |                         |
|----------------------------------|---------------------------|-------------------------|
| <b>Gene</b>                      | <b>Forward</b>            | <b>Reverse</b>          |
| HER2                             | TGCCTGTCCCTACAACCTACCTT   | CCGCTGTGTTCCATCCTC      |
| CTBP1(reference)                 | GGGAGATCCGCAGAGCCAT       | GGTCCTTGTTGACACAGTTCTTC |
| UBQLN1 (reference)               | AGTAAATCCTCAGCTACAGAATCCA | TTGCTTCACGGTTCAAAAATC   |

**Supplementary Table S2: Short tandem repeat profiles of human patient tumors and PDXs**

| Locus    | Chromosome              | CX4      | CX4-M1   | CX6      | CX6-M1   | CX8      | CX8-M1   | CX10     | CX10-M1  | CX11     | CX11-M1  | CX13     | CX13-M1  | CX14     | CX14-M1  | CX15     | CX15-M1  | CX17   | CX17-M1 |
|----------|-------------------------|----------|----------|----------|----------|----------|----------|----------|----------|----------|----------|----------|----------|----------|----------|----------|----------|--------|---------|
| Location |                         |          |          |          |          |          |          |          |          |          |          |          |          |          |          |          |          |        |         |
| D8S1179  | 8                       | 10, 13   | 10, 13   | 10, 15   | 10, 15   | 15       | 15       | 11, 14   | 11, 14   | 11, 15   | 11, 15   | 13       | 13       | 13, 14   | 13, 14   | 11, 14   | 11, 14   | 10, 14 | 10, 14  |
| D21S11   | 21q11.2-q21             | 30       | 30       | 30       | 30       | 30, 31.2 | 30, 31.2 | 28, 29   | 28, 29   | 31       | 31       | 30       | 30       | 28, 32.2 | 28, 32.2 | 30, 33.2 | 30, 33.2 | 29, 30 | 29, 30  |
| D7S820   | 7q11.21-22              | 13       | 13       | 8, 14    | 8, 14    | 11, 12   | 11, 12   | 11       | 11       | 11       | 11       | 10, 11   | 10, 11   | 11       | 11       | 10       | 10       | 8, 10  | 8, 10   |
| CSF1PO   | 5q33.3-34               | 10       | 10       | 10, 12   | 10, 12   | 11, 12   | 11, 12   | 12       | 12       | 10       | 10       | 11, 12   | 11, 12   | 12       | 12       | 11, 12   | 11, 12   | 9, 11  | 9, 11   |
| D3S1358  | 3p                      | 15       | 15       | 15       | 15       | 14, 17   | 14, 17   | 15, 16   | 15, 16   | 16, 17   | 16, 17   | 16       | 16       | 15, 16   | 15, 16   | 15, 16   | 15, 16   | 17     | 17      |
| TH01     | 11p15.5                 | 7, 8     | 7, 8     | 6, 9     | 6, 9     | 9, 9.3   | 9, 9.3   | 9        | 9        | 9        | 9        | 9        | 9        | 7        | 7        | 7, 9     | 7, 9     | 6, 7   | 6, 7    |
| D13S317  | 13q22-31                | 11       | 11       | 8, 11    | 8        | 10, 11   | 10, 11   | 12       | 12       | 8        | 8        | 8, 14    | 8, 14    | 11, 13   | 11, 13   | 12       | 12       | 10, 11 | 10, 11  |
| D16S539  | 16q24-qter              | 9        | 9        | 9, 11    | 9, 11    | 9        | 9        | 9, 13    | 9, 13    | 9, 11    | 9, 11    | 11, 12   | 11, 12   | 9, 10    | 9, 10    | 10, 11   | 10, 11   | 9, 11  | 9, 11   |
| D2S1338  | 2q35-37.1               | 22, 23   | 22, 23   | 18       | 18       | 17, 25   | 17, 25   | 23, 25   | 23, 25   | 22       | 22       | 17, 19   | 17, 19   | 21, 25   | 21, 25   | 18, 20   | 18, 20   | 18, 24 | 18, 24  |
| D19S433  | 19q12-13.1              | 15, 15.2 | 15, 15.2 | 12, 13.2 | 12, 13.2 | 13, 13.2 | 13, 13.2 | 13, 14.2 | 13, 14.2 | 13, 15.2 | 13, 15.2 | 13, 14.2 | 13, 14.2 | 13, 16.2 | 13, 16.2 | 14, 15.2 | 14, 15.2 | 12, 14 | 12, 14  |
| vWA      | 12p12-pter              | 14       | 14       | 16, 17   | 16, 17   | 17       | 17       | 19       | 19       | 14       | 14       | 17, 18   | 17, 18   | 14, 18   | 14, 18   | 17, 18   | 17, 18   | 16     | 16      |
| TPOX     | 2p23-2per               | 8, 11    | 8, 11    | 8        | 8        | 8        | 8        | 11       | 11       | 8, 9     | 8, 9     | 8, 11    | 8, 11    | 8, 11    | 8, 11    | 8, 9     | 8, 9     | 8, 9   | 8, 9    |
| D18S51   | 18q21.3                 | 14, 22   | 14, 22   | 12, 13   | 12, 13   | 14       | 14       | 15, 16   | 15, 16   | 21, 22   | 21, 22   | 17, 18   | 17, 18   | 13, 20   | 13       | 17       | 17       | 14, 18 | 14, 18  |
| X        | X:p22.1-22.3<br>Y:p11.2 | X        | X        | X        | X        | X        | X        | X        | X        | X        | X        | X        | X        | X        | X        | X        | X        | X      | X       |
| D5S818   | 5q21-31                 | 11, 13   | 11, 13   | 12, 13   | 12, 13   | 11, 13   | 11, 13   | 11       | 11       | 11, 13   | 11, 13   | 10, 11   | 10, 11   | 9, 12    | 9        | 10, 11   | 10, 11   | 9      | 9       |
| FGA      | 4q28                    | 24       | 24       | 23       | 23       | 17, 25   | 17, 25   | 23       | 23       | 21, 22   | 21, 22   | 21       | 21       | 22, 23   | 22, 23   | 21, 23   | 21, 23   | 23, 24 | 23, 24  |

**Supplementary Table S3: Genomic profiles of cervical cancer patients**

| Sample | Chromosome | Position  | Gene   | Ref  | Alt | Vaf   | Variant         |
|--------|------------|-----------|--------|------|-----|-------|-----------------|
| CX-4   | chr3       | 37067297  | MLH1   | C    | T   | 89.31 | P403L           |
|        | chr4       | 153247366 | FBXW7  | C    | T   | 68.69 | R479Q           |
|        | chr3       | 178936091 | PIK3CA | G    | A   | 51.52 | E545K           |
|        | chr4       | 1803564   | FGFR3  | C    | T   | 46.41 | R248C           |
|        | chr11      | 108188181 | ATM    | G    | C   | 44.82 | E2094Q          |
|        | chr2       | 30143236  | ALK    | G    | A   | 42.17 | P97L            |
| CX-6   | chr12      | 46123647  | ARID2  | C    | A   | 48.97 | P10T            |
|        | chr10      | 123256225 | FGFR2  | C    | T   | 12.34 | V563I           |
| CX-8   | chr17      | 29661936  | NF1    | G    | T   | 28.54 | D1965Y          |
| CX-10  | chr13      | 32914277  | BRCA2  | A    | G   | 67.38 | I1929V          |
|        | chr19      | 17950437  | JAK3   | G    | C   | 9.77  | I430M           |
|        | chr19      | 17952325  | JAK3   | G    | C   | 9.61  | L339V           |
| CX-11  | chr6       | 157528702 | ARID1B | G    | A   | 59.19 | A2143T          |
|        | chr9       | 21971161  | CDKN2A | T    | C   | 45.19 | H66R            |
|        | chr9       | 139413916 | NOTCH1 | G    | A   | 26.47 | R282C           |
| CX-13  | chr7       | 148525940 | EZH2   | C    | G   | 29.78 | E173Q           |
| CX-14  | chr19      | 1221213   | STK11  | TACA | T   | 58.8  | YN246Y          |
|        | chr12      | 56482537  | ERBB3  | G    | A   | 34.36 | E332K           |
| CX-15  | chr9       | 139393636 | NOTCH1 | G    | A   | 57.12 | R2004C          |
|        | chr1       | 162746114 | DDR2   | G    | A   | 47.71 | R746Q           |
|        | chr15      | 90645555  | IDH2   | G    | C   | 46.27 | P23R            |
|        | chr9       | 21971161  | CDKN2A | T    | C   | 41.89 | H66R            |
| CX-17  | chr1       | 11186787  | MTOR   | C    | A   | 49.61 | V2140L          |
|        | chr17      | 7579882   | TP53   | C    | G   | 45.89 | E11Q            |
|        | chr1       | 156846336 | NTRK1  | C    | T   | 45.36 | R593W           |
|        | chr13      | 32929042  | BRCA2  | C    | G   | 7.89  | A2351G          |
|        | chr4       | 153247157 | FBXW7  | C    | T   | 7.64  | splicing defect |

| Sample | Chr   | Start     | End       | Gene   | CNV | avg.L2R |
|--------|-------|-----------|-----------|--------|-----|---------|
| CX4    |       |           |           |        |     |         |
| CX6    |       |           |           |        |     |         |
| CX8    | chr19 | 1206888   | 1226679   | STK11  | del | -1.426  |
| CX10   |       |           |           |        |     |         |
| CX11   |       |           |           |        |     |         |
| CX13   | chr17 | 7569522   | 7579985   | TP53   | del | -1.804  |
| CX14   | chr17 | 7569522   | 7579985   | TP53   | del | -1.549  |
| CX15   |       |           |           |        |     |         |
| CX17   | chr17 | 37855737  | 37884329  | ERBB2  | amp | 2.425   |
|        | chr19 | 40739406  | 40771239  | AKT2   | amp | 1.543   |
|        | chr3  | 178916581 | 178952186 | PIK3CA | amp | 1.071   |
|        | chr4  | 1795633   | 1809435   | FGFR3  | del | -1.81   |

avg. L2R, average  $\log_2$  R ratio; CNV, copy number variation.

**Supplementary Table S4: Clinicopathological characteristics of 22 metastatic cervical cancer patients**

| No | Age | Metastasis site    | Pathology                                                   | Pathologic stage | Surgery            | Adjuvant therapy | Time to metastasis (months) | HER2 immunohistochemistry |
|----|-----|--------------------|-------------------------------------------------------------|------------------|--------------------|------------------|-----------------------------|---------------------------|
| 1  | 62  | Pubis              | SCC                                                         | NA               | ND                 | CCRT             | 12                          | Negative                  |
| 2  | 44  | colon              | SCC                                                         | pT3cN0           | RH+LND             | CT               | NA                          | Negative                  |
| 3  | 31  | brain              | SCC                                                         | NA               | ND                 | CT               | 16                          | Negative                  |
| 4  | 59  | lung               | Small cell carcinoma, non-pulmonary type                    | NA               | TAH                | CT               | 96                          | Negative                  |
| 5  | 64  | colon              | SCC                                                         | NA               | ND                 | NA               | *-                          | Negative                  |
| 6  | 53  | liver              | SCC                                                         | pT1b1N0          | RH+LND             | CT               | 32                          | Negative                  |
| 7  | 40  | stomach            | SCC                                                         | NA               | ND                 | CCRT             | 10                          | Negative                  |
| 8  | 51  | liver              | Lymphoepithelioma-like carcinoma                            | pT1b1N0          | RH+LND             | CT               | 36                          | Negative                  |
| 9  | 73  | small intestine    | SCC                                                         | NA               | ND                 | CCRT             | *-                          | Negative                  |
| 10 | 51  | colon, ovary       | SCC                                                         | ypT3cN0M1        | RH+LND             | CCRT             | *-                          | Negative                  |
| 11 | 31  | Abdominal wall     | SCC                                                         | pT2aN1           | RH+LND             | CCRT             | 6                           | Negative                  |
| 12 | 67  | rectum             | AC                                                          | pT1b1N0          | RH+LND             | CCRT             | 19                          | Negative                  |
| 13 | 50  | rectum             | SCC                                                         | pT1b2N0          | RH+LND             | CCRT             | 36                          | Negative                  |
| 14 | 76  | rectum             | SCC                                                         | pT1b1N0          | RH+LND             | RT               | 33                          | Negative                  |
| 15 | 62  | lung               | SCC                                                         | pT2bN0           | RH+LND             | RT               | 69                          | Negative                  |
| 16 | 33  | colon              | SCC                                                         | pT1b2N0          | RH+LND             | CT               | 16                          | Negative                  |
| 17 | 55  | lymph node, brain  | Mixed small cell neuroendocrine and squamous cell carcinoma | pT1b1N0          | RH+LND             | CCRT             | 28                          | Negative                  |
| 18 | 46  | lung               | SCC                                                         | pT1b1N0          | RH+LND             | CT               | 37                          | Negative                  |
| 19 | 37  | chest wall         | SCC                                                         | pT1b1N0          | RH+LND             | CCRT             | 52                          | Negative                  |
| 20 | 47  | liver              | SCC                                                         | NA               | ND                 | CT               | 60                          | Negative                  |
| 21 | 42  | Rectal wall, colon | SCC                                                         | pT1b1N0          | RH+LND             | CT               | 12                          | Positive                  |
| 22 | 39  | pelvic wall, lung  | SCC                                                         | pT1b2N0          | trachelectomy +LND | CCRT             | 6                           | Negative                  |

AC, adenocarcinoma; CCRT, chemo-radiation therapy; CT, chemotherapy; LND, lymph node dissection; NA, not available; ND, not done; RH, radical hysterectomy; RT, radiation therapy; SCC, squamous cell carcinoma; TAH, total abdominal hysterectomy

\*-, primary and metastatic tumors were diagnosed simultaneously.
